# Supplementary material
Source: PubMed Central journal article supplement (PMC3436168)
Supplement: supp_M112.386854_jbc.M112.386854-1.pdf [file supp_M112.386854_jbc.M112.386854-1.pdf]

**Supplementary Table S1. Primers used for quantitative RT-PCR.**

| Genbank ID     | Gene           | F/R     | Primer Sequence        | Product (nt) |
|----------------|----------------|---------|------------------------|--------------|
| NM_013684.3    | mTBP           | Forward | cttcgtgcaagaaatgctga   | 79           |
| NM_013684.3    | mTBP           | Reverse | cagttgtccgtggctctctt   |              |
| NM_008904.2    | PGC-1a (ex3-5) | Forward | aatgcagcggctcttagcact  | 140          |
| NM_008904.2    | PGC-1a (ex3-5) | Reverse | acgtctttgtggcttttgc    |              |
| NM_011044.2    | PEPCK (PCK1)   | Forward | tgctggatgaagtttgatg    | 56           |
| NM_011044.2    | PEPCK (PCK1)   | Reverse | cgttttctgggtgatagcc    |              |
| NM_008061.3    | G6P            | Forward | agcagttccctgtcacctgt   | 125          |
| NM_008061.3    | G6P            | Reverse | tggctttttcttctcgaa     |              |
| NM_001162946.1 | PCX            | Forward | ctccatgtctgggatgacct   | 127          |
| NM_001162946.1 | PCX            | Reverse | agcccttcccagactactcac  |              |
| NM_011480.3    | SREBP-1c       | Forward | gagccatggattgcacattt   | 65           |
| NM_011480.3    | SREBP-1c       | Reverse | cgggaagtactgtcttgg     |              |
| NM_007988.3    | FAS            | Forward | gcacctttgatgacatcgtg   | 94           |
| NM_007988.3    | FAS            | Reverse | tcaggttcagttcccacaga   |              |
| NM_009127.4    | SCD-1          | Forward | cctcctgcaagctctacacc   | 59           |
| NM_009127.4    | SCD-1          | Reverse | cagagcgtgtgctcatgagt   |              |
| NM_133360.2    | ACC-1          | Forward | ggacaccagttttgcatga    | 76           |
| NM_133360.2    | ACC-1          | Reverse | agtttggaggacatcgaaa    |              |
| NM_133904.2    | ACC-2          | Forward | cacatccttgtggattacgg   | 119          |
| NM_133904.2    | ACC-2          | Reverse | cgataatccggtcttctgc    |              |
| NM_013495.2    | CPT1a          | Forward | acagcttcagacgtctctgc   | 88           |
| NM_013495.2    | CPT1a          | Reverse | atcagttggcctcacagactcc |              |
| NM_015729.2    | AOX            | Forward | ttatgacagacagagatgg    | 63           |
| NM_015729.2    | AOX            | Reverse | tatgtggcagtggtttccaa   |              |
| NM_008256.4    | HMGCS2         | Forward | cctggcctcacttctctctc   | 68           |
| NM_008256.4    | HMGCS2         | Reverse | aggagaaggctccaatcctg   |              |
| NM_008254.2    | HMGCL          | Forward | aagttcccggcatcaacta    | 93           |
| NM_008254.2    | HMGCL          | Reverse | gaagacgctcacttcttgg    |              |
| NM_001122683.1 | BDH            | Forward | atccttcagccctgacacc    | 97           |
| NM_001122683.1 | BDH            | Forward | cccaaatccagagtcacagc   |              |
| NM_009693.2    | APOB           | Reverse | acctcctgaaaaatgggactg  | 80           |
| NM_009693.2    | APOB           | Forward | tgtgtatttgactctgccatca |              |
| NM_009696.3    | APOE           | Reverse | cagagctcccaagtacaca    | 57           |
| NM_009696.3    | APOE           | Forward | ttcctcatagttctccca     |              |
| NM_010292.4    | GCK            | Reverse | gcagaaggaacaacatcgt    | 80           |
| NM_010292.4    | GCK            | Forward | attgccaccacatctctc     |              |
| NM_001198933.1 | ME1            | Reverse | tcactttggatgtggaaca    | 62           |
| NM_001198933.1 | ME1            | Forward | cagccgatgtacagtggat    |              |
| NM_033218.1    | Srebf2         | Reverse | ccctcagtcaccttctggag   | 91           |
| NM_033218.1    | Srebf2         | Forward | aggttttaggttggcagca    |              |
| NM_145942.4    | Hmgcs1         | Reverse | ctatggttccctggcttctg   | 51           |
| NM_145942.4    | Hmgcs1         | Forward | gccaactgctgaggtgagta   |              |
| NM_008255.2    | Hmgcr          | Reverse | tcttggatgccttcttga     | 73           |
| NM_008255.2    | hmgcr          | Forward | gaagcagcacatgatctcca   |              |
| NM_023556.2    | mvk            | Reverse | aacccttctggttggacaa    | 74           |
| NM_023556.2    | mvk            | Forward | gaagacatgtcccttctctg   |              |
| NM_026784.3    | pmvk           | Reverse | gctctctggtccactcaagg   | 73           |
| NM_026784.3    | pmvk           | Forward | gctcgcattccagaagtctct  |              |
| NM_138656.2    | mvd            | Reverse | gtgaacaacttcccactgc    | 92           |
| NM_138656.2    | mvd            | Forward | tcaaccatagacctgagc     |              |
| NM_134469.3    | fdps           | Reverse | tgaacctgctggagctctt    | 57           |
| NM_134469.3    | fdps           | Forward | gagctgcccgatctctgtc    |              |
| NM_010282.2    | ggps1          | Reverse | aagcaactttcacaggcatt   | 95           |
| NM_010282.2    | ggps1          | Forward | tggcattatgcaacattcag   |              |
| NM_010191.2    | fdft1          | Reverse | gaaggaagtttggcctcag    | 88           |
| NM_010191.2    | fdft1          | Forward | acggccacatctacgttctc   |              |
| NM_009270.3    | sqle           | Reverse | cagcttcttctcttctct     | 84           |
| NM_009270.3    | sqle           | Forward | ccagtaagagggtgctcag    |              |
| NM_146006.1    | lss            | Forward | gaatcagttccgtccatca    | 87           |
| NM_146006.1    | lss            | Reverse | tcagcattctcaagctcag    |              |
| NM_053272.2    | dhcr24         | Forward | tcatgacggacagctagag    | 79           |
| NM_053272.2    | dhcr24         | Reverse | tccacatgcttgaagaacca   |              |
| NM_010700.2    | ldlr           | Forward | cgtagaacatgactgcaagga  | 95           |
| NM_010700.2    | ldlr           | Reverse | tccccactgtgacactgaa    |              |
